# Supplementary material
Source: publisher figshare collection journal article supplement (https://frontiersin.figshare.com/ndownloader/files/25459880)

Figure 1

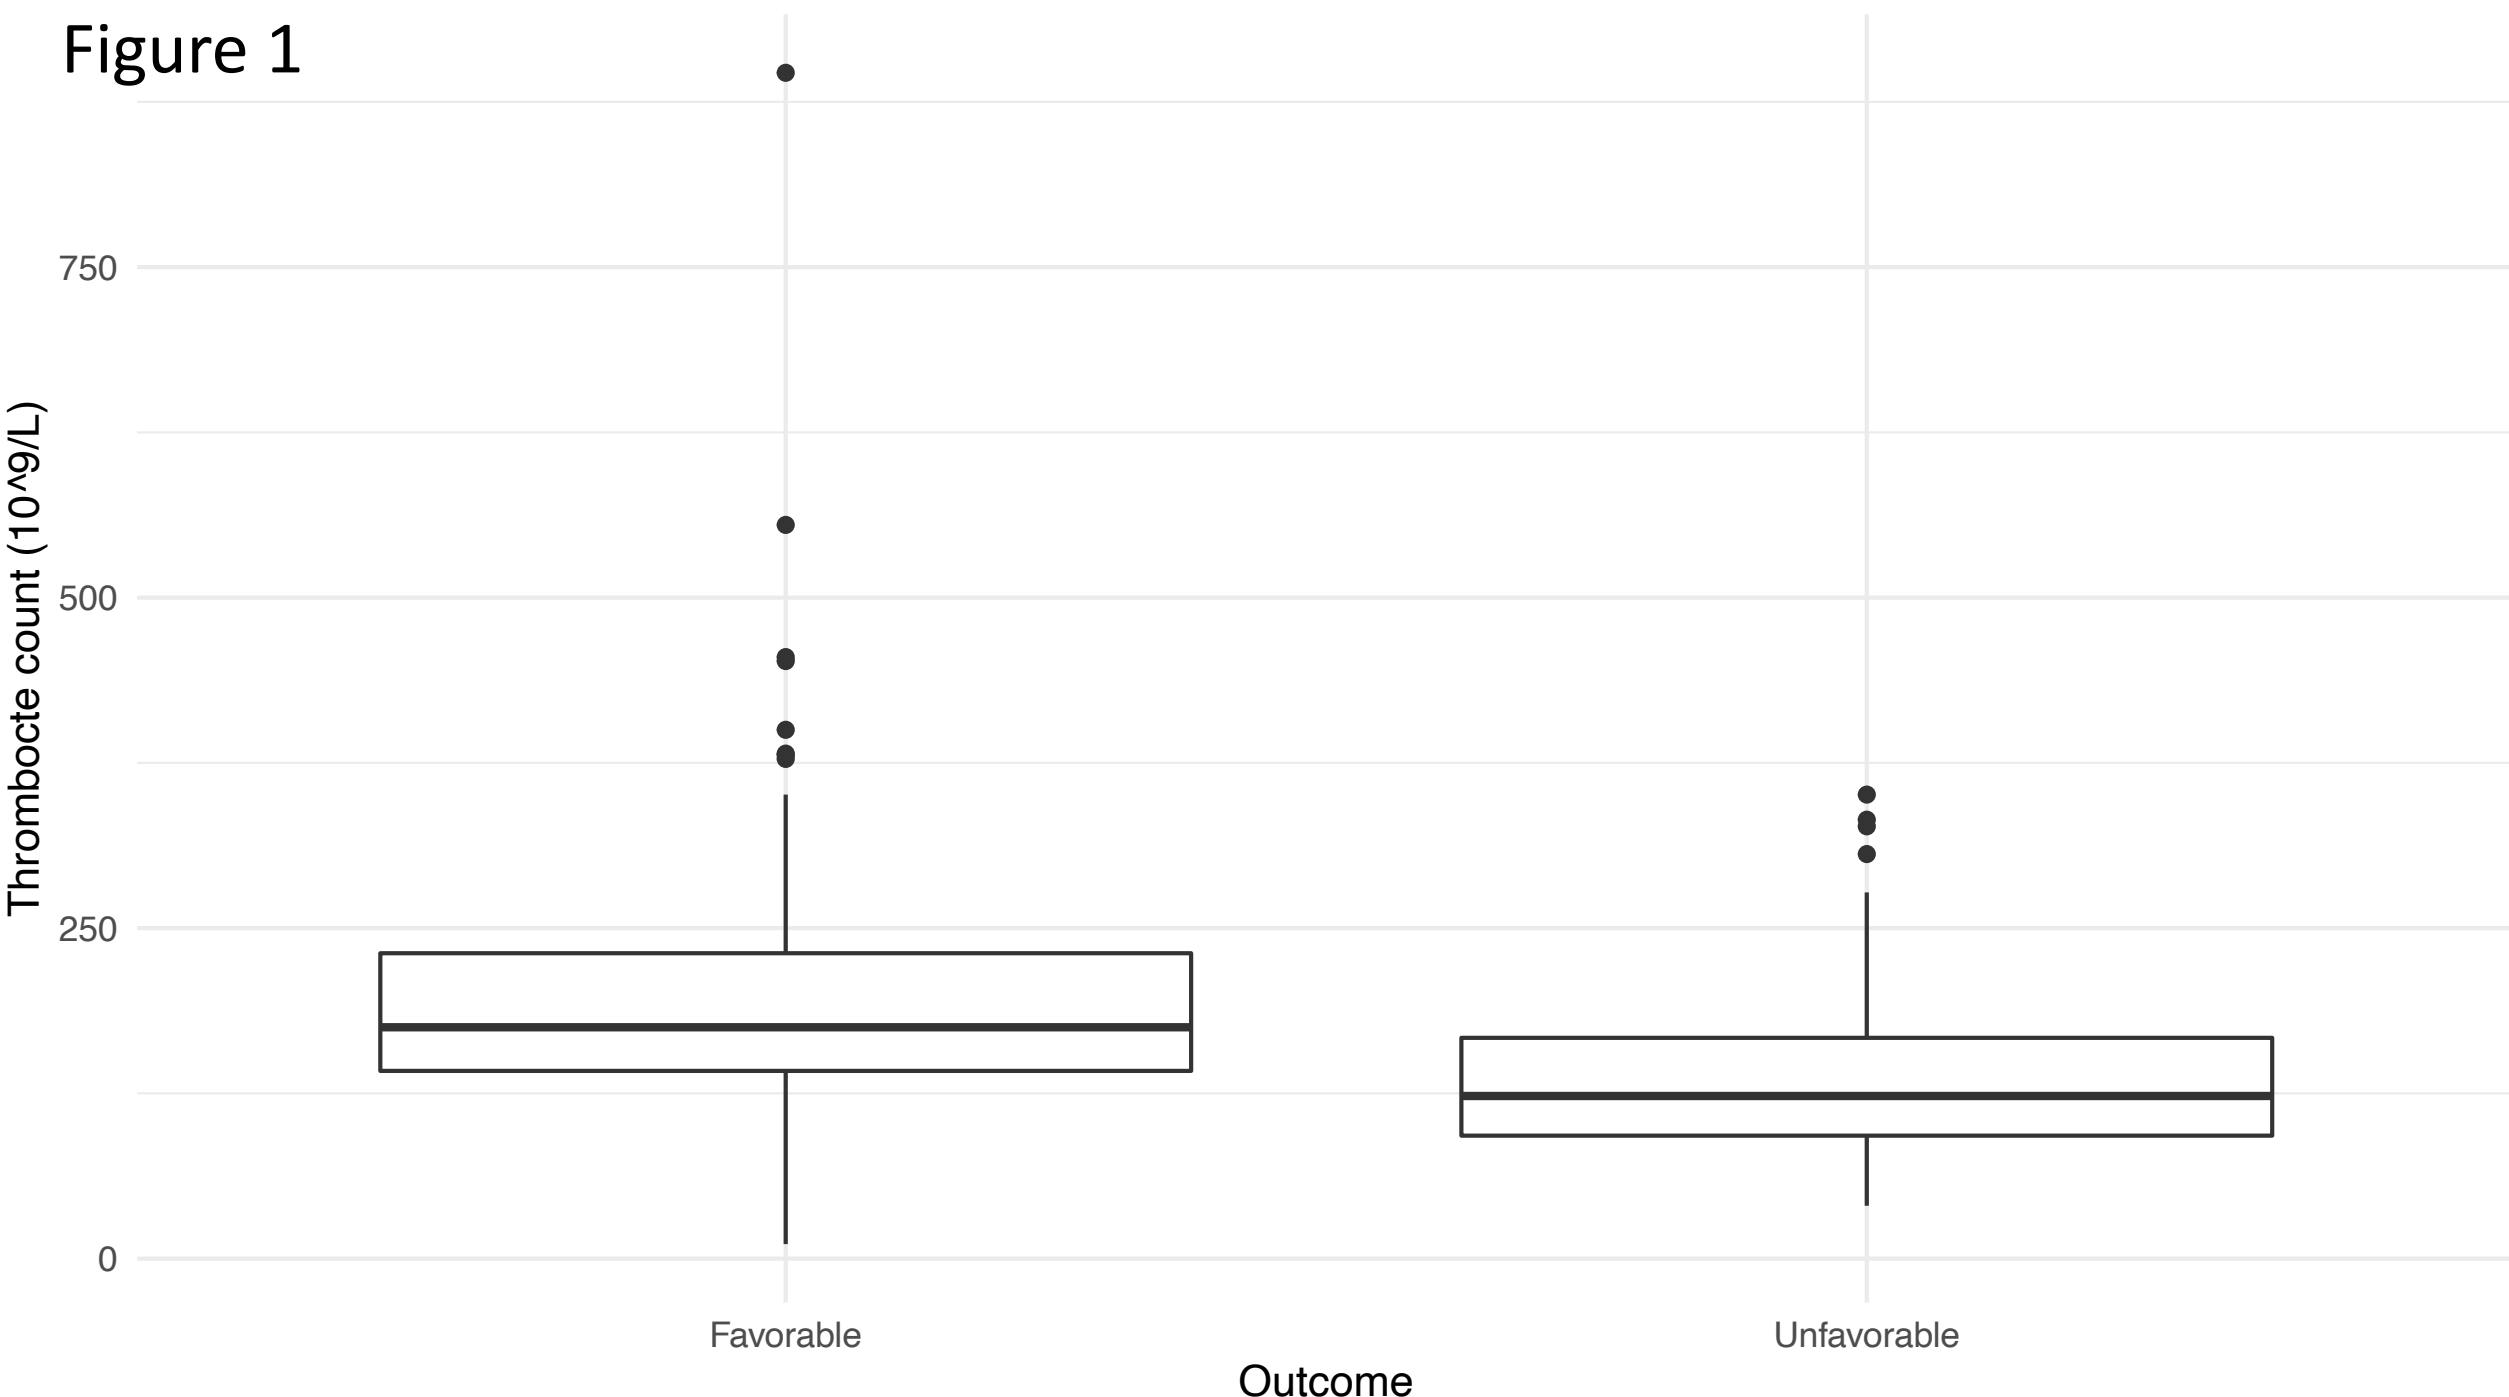

Figure 2

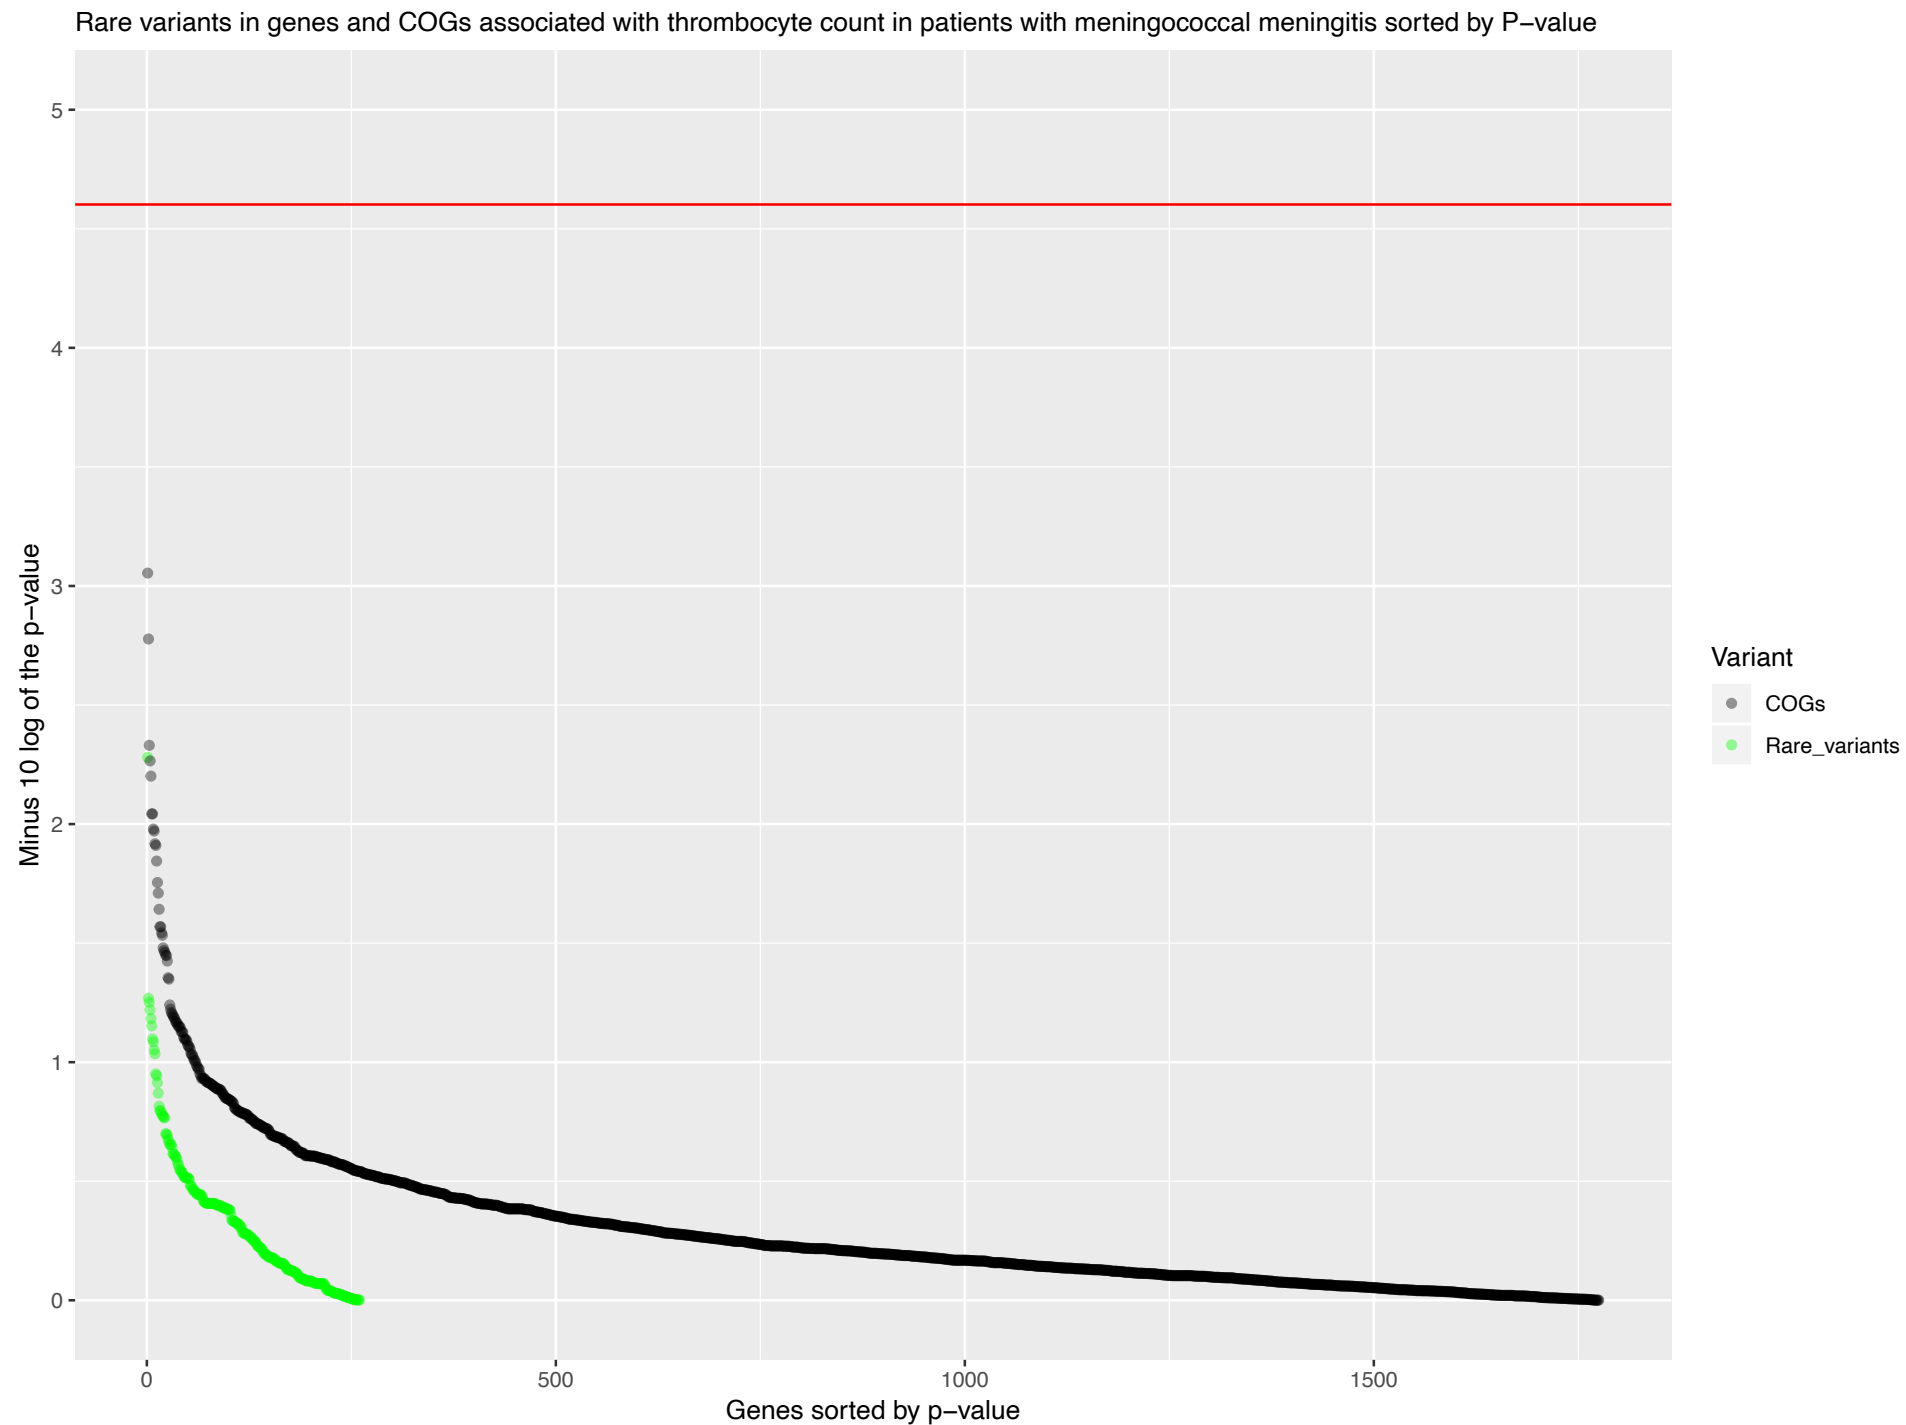

Figure 3

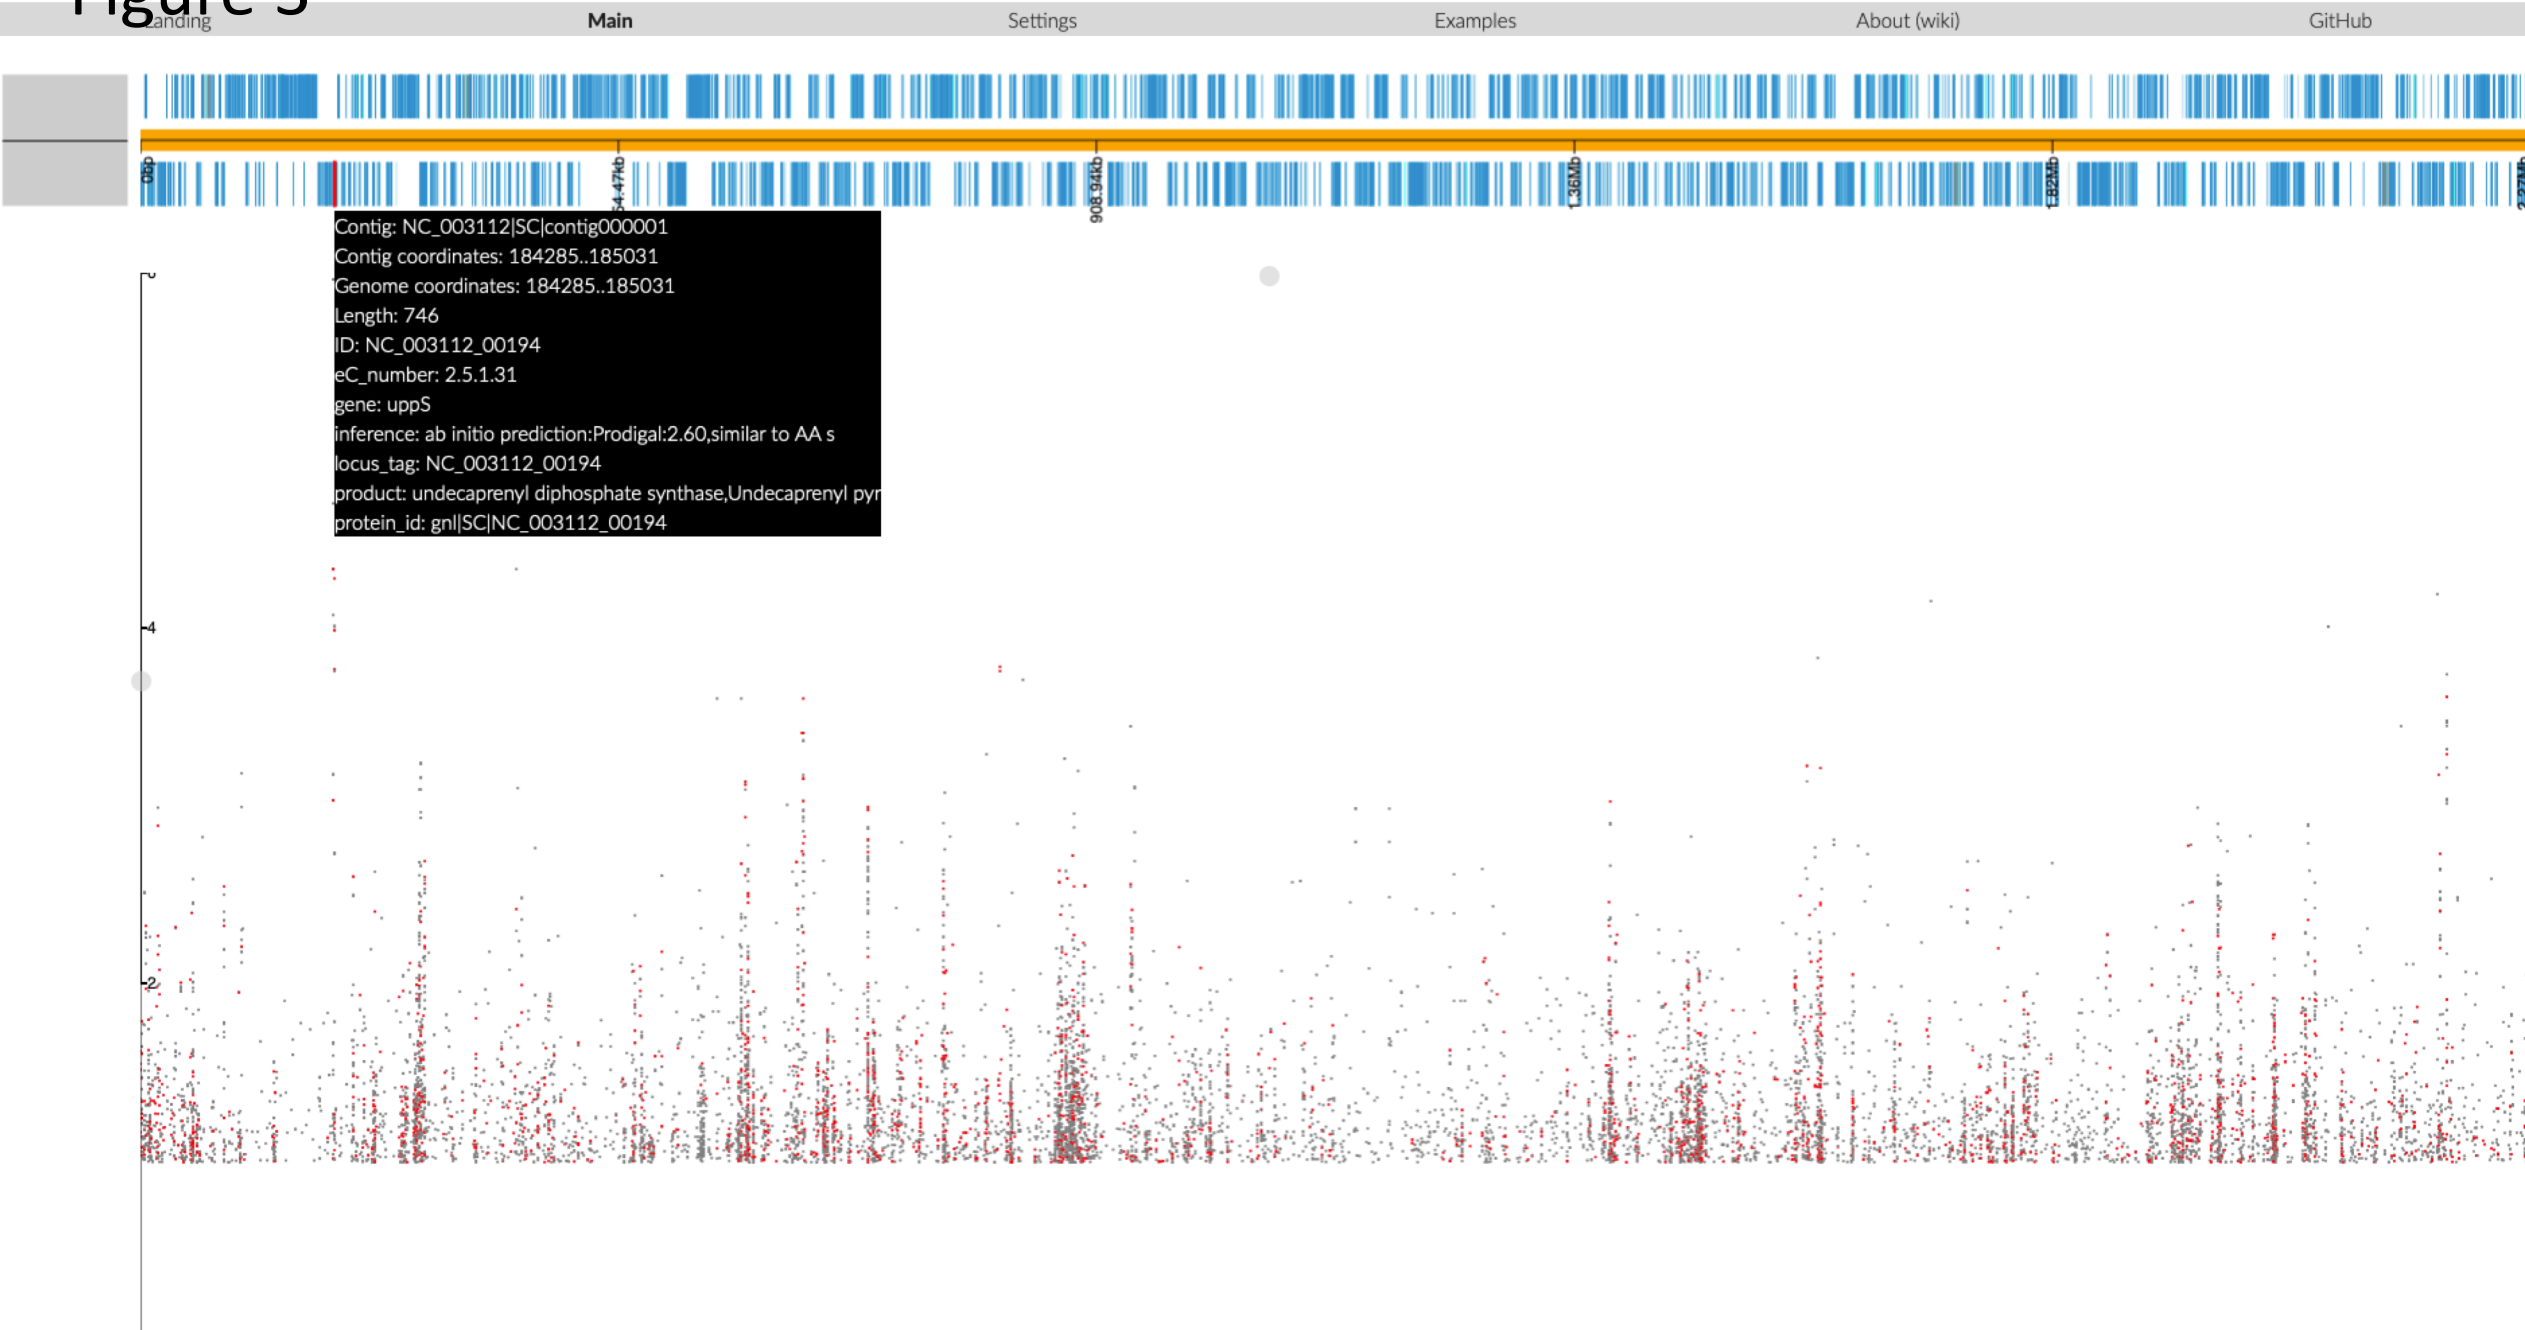

# Figure 4

**A** Q-Q plot of snp GWAS p-values for thrombocyte count

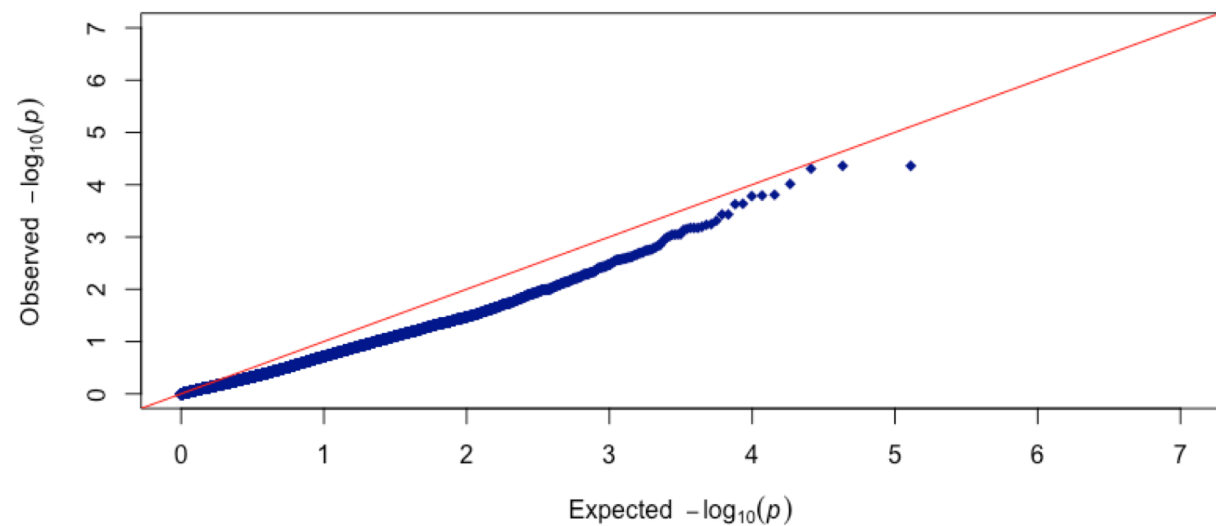

**B** Q-Q plot of snp GWAS p-values for outcome

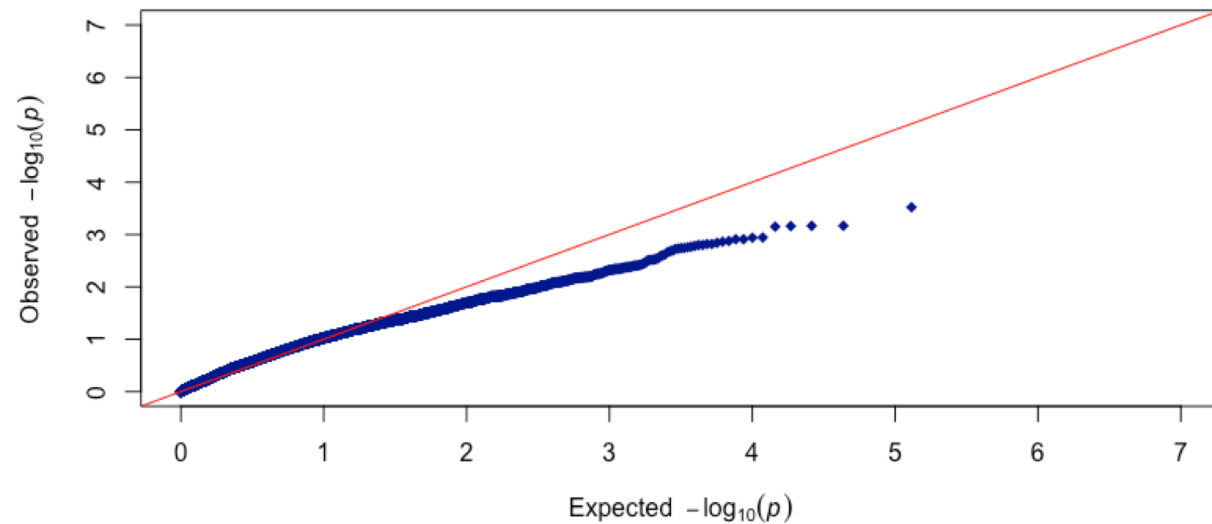

**C** Q-Q plot of unitig GWAS p-values for thrombocyte count

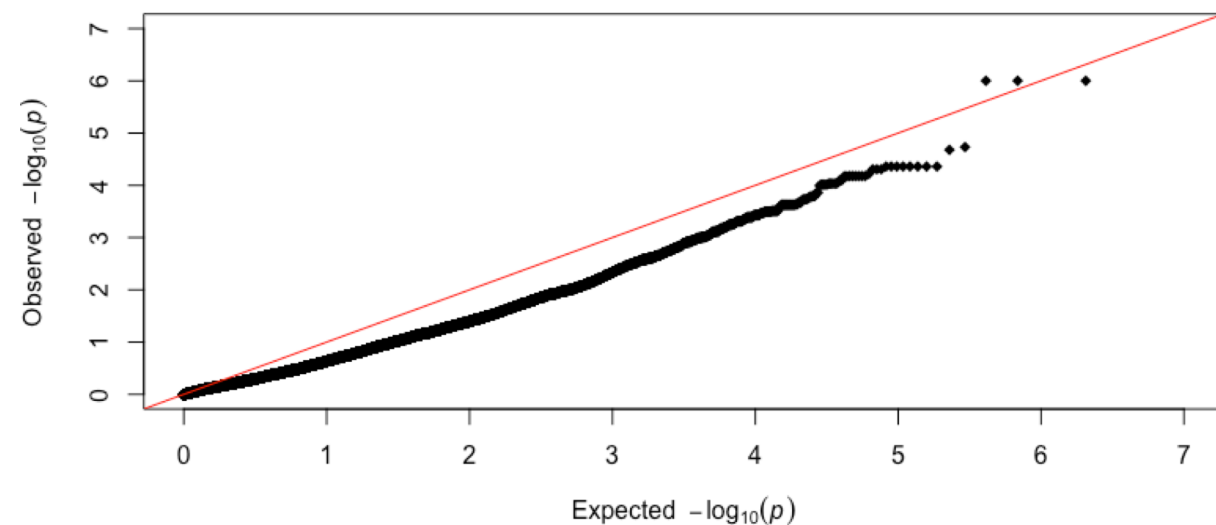

**D** Q-Q plot of unitig GWAS p-values for outcome

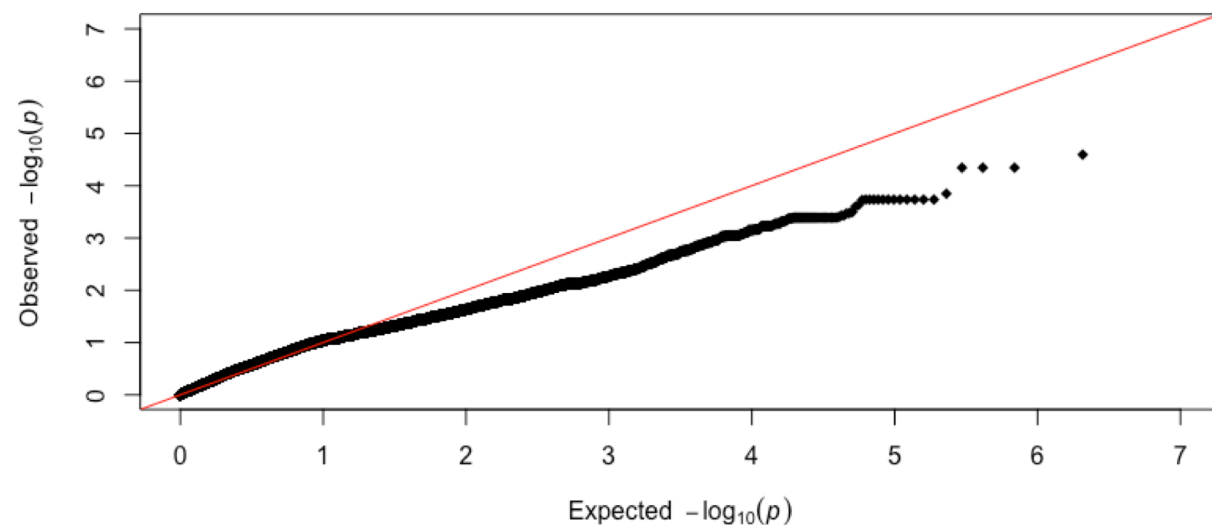

Supplement: Supplementary file [file 25459880]
